# Supplementary material for: Impact of an Intervention on Healthy Offerings and Allergenic Food Management in Restaurants: A Parallel Randomized Controlled Study
Source: MDPI journal article supplement (doi:10.3390/nu15234869), 2023-11-22
Supplement: s1 [file s1]

# Supplementary Table S1

Traffic light of the restaurants for starters and main dishes in control and intervention groups at the beginning and at the end of the study

|                             | Control  |         |       | Intervention |           |       |              |
|-----------------------------|----------|---------|-------|--------------|-----------|-------|--------------|
|                             | Baseline | End     | P     | Baseline     | End       | P     | P for inter- |
|                             | %(n)     | % (n)   |       | % (n)        | % (n)     |       | treatment    |
| <b>Starters</b>             |          |         |       |              |           |       |              |
| <i><b>Energy</b></i>        |          |         | 0.393 |              |           | 0.974 | 0.950        |
| Green (2)                   | 0 (0)    | 0 (0)   |       | 6.9 (2)      | 7.7 (2)   |       |              |
| Orange (1)                  | 50 (5)   | 25 (1)  |       | 34.5 (10)    | 34.6 (9)  |       |              |
| Red (0)                     | 50 (5)   | 75 (3)  |       | 58.6 (17)    | 57.7 (15) |       |              |
| <i><b>Protein</b></i>       |          |         |       |              |           |       |              |
| Green                       | 0 (0)    | 0 (0)   | 0.334 | 10.3 (3)     | 11.5 (3)  | 0.848 | 0.956        |
| Orange                      | 20 (2)   | 0 (0)   |       | 6.9 (2)      | 7.7 (2)   |       |              |
| Red                         | 80 (8)   | 100 (4) |       | 82.8 (24)    | 80.8 (21) |       |              |
| <i><b>Carbohydrates</b></i> |          |         |       |              |           |       |              |
| Green                       | 60 (6)   | 25 (1)  | 0.442 | 44.8 (13)    | 53.8 (14) | 0.865 | 0.946        |
| Orange                      | 20 (2)   | 50 (2)  |       | 41.4 (12)    | 34.6 (9)  |       |              |
| Red                         | 20 (2)   | 25 (1)  |       | 13.8 (4)     | 11.5 (3)  |       |              |

**Supplementary Table S1 (cont)**

***Sugar***

|        |        |        |       |           |           |       |       |
|--------|--------|--------|-------|-----------|-----------|-------|-------|
| Green  | 60 (6) | 50 (2) | 0.733 | 65.5 (19) | 70.4 (19) | 0.807 | 0.911 |
| Orange | 40 (4) | 50 (2) |       | 17.2 ( 5) | 18.5 (5)  |       |       |
| Red    | 0 (0)  | 0 (0)  |       | 17.2 ( 5) | 11.1 (3)  |       |       |

***Total Fat***

|        |        |         |       |          |           |       |       |
|--------|--------|---------|-------|----------|-----------|-------|-------|
| Green  | 0 (0)  | 0 (0)   | 0.217 | 3.4 (1)  | 3.7 (1)   | 0.898 | 0.690 |
| Orange | 30 (3) | 0 (0)   |       | 27.6 (8) | 22.2 (6)  |       |       |
| Red    | 70 (7) | 100 (4) |       | 69 (20)  | 74.1 (20) |       |       |

***Saturated Fatty Acids***

|        |        |        |     |           |           |       |       |
|--------|--------|--------|-----|-----------|-----------|-------|-------|
| Green  | 0 (0)  | 0 (0)  |     | 13.8 (4)  | 14.8 (4)  | 0.990 | 0.916 |
| Orange | 50 (5) | 50 (2) | 1.0 | 31 (9)    | 29.6 (8)  |       |       |
| Red    | 50 (5) | 50 (2) |     | 55.2 (16) | 55.6 (15) |       |       |

***Sodium***

|        |         |         |   |           |           |       |       |
|--------|---------|---------|---|-----------|-----------|-------|-------|
| Green  | 0 (0)   | 0 (0)   | - | 10.3 (3)  | 11.1 (3)  | 0.848 | 0.716 |
| Orange | 0 (0)   | 0 (0)   |   | 6.9 (2)   | 11.1 (3)  |       |       |
| Red    | 100 (0) | 100 (4) |   | 82.8 (24) | 77.8 (21) |       |       |

***Fiber***

|       |        |       |       |          |          |       |       |
|-------|--------|-------|-------|----------|----------|-------|-------|
| Green | 10 (1) | 0 (0) | 0.769 | 27.6 (8) | 18.5 (5) | 0.716 | 0.770 |
|-------|--------|-------|-------|----------|----------|-------|-------|

**Supplementary Table S1 (cont)**

|        |        |        |  |           |           |  |  |
|--------|--------|--------|--|-----------|-----------|--|--|
| Orange | 60 (6) | 75 (3) |  | 34.5 (10) | 40.7 (11) |  |  |
| Red    | 30 (3) | 25 (1) |  | 37.9 (11) | 40.7 (11) |  |  |

***Main dishes***

***Energy***

|        |           |          |       |           |           |       |       |
|--------|-----------|----------|-------|-----------|-----------|-------|-------|
| Green  | 6.3 (1)   | 11.1 (1) | 0.894 | 4.9 (2)   | 6.5 (2)   | 0.954 | 0.897 |
| Orange | 31.3 (5)  | 33.3 (3) |       | 22.0 (9)  | 22.6 (7)  |       |       |
| Red    | 62.5 (10) | 55.6 (5) |       | 73.2 (30) | 71.0 (22) |       |       |

***Protein***

|        |           |          |       |          |          |   |       |
|--------|-----------|----------|-------|----------|----------|---|-------|
| Green  | 6.3 (1)   | 11.1 (1) | 0.817 | 0 (0)    | 0 (0)    | - | 0.936 |
| Orange | 6.3 (1)   | 11.1 (1) |       | 0 (0)    | 0 (0)    |   |       |
| Red    | 87.5 (14) | 77.8 (7) |       | 100 (41) | 100 (31) |   |       |

***Carbohydrates***

|        |           |          |       |           |           |       |       |
|--------|-----------|----------|-------|-----------|-----------|-------|-------|
| Green  | 62.5 (10) | 77.8 (7) | 0.432 | 36.6 (15) | 32.3 (10) | 0.890 | 0.991 |
| Orange | 37.5 (6)  | 22.2 (2) |       | 36.6 (15) | 41.9 (13) |       |       |
| Red    | 0 (0)     | 0 (0)    |       | 26.8 (11) | 25.8 (8)  |       |       |

***Sugar***

|        |           |          |       |           |           |       |       |
|--------|-----------|----------|-------|-----------|-----------|-------|-------|
| Green  | 81.3 (13) | 77.8 (7) | 0.835 | 85.4 (35) | 90.3 (28) | 0.545 | 0.713 |
| Orange | 18.8 (3)  | 22.2 (2) |       | 9.8 (4)   | 3.2 (1)   |       |       |

**Supplementary Table S1 (cont)**

|                                     |           |          |       |           |           |       |       |
|-------------------------------------|-----------|----------|-------|-----------|-----------|-------|-------|
| Red                                 | 0 (0)     | 0 (0)    |       | 4.9 (2)   | 6.5 (2)   |       |       |
| <b><i>Total Fat</i></b>             |           |          |       |           |           |       |       |
| Green                               | 0 (0)     | 0 (0)    | 0.918 | 0 (0)     | 0 (0)     | 0.658 | 0.648 |
| Orange                              | 12.5 (2)  | 11.1 (1) |       | 24.4 (10) | 29.0 (9)  |       |       |
| Red                                 | 87.5 (14) | 88.9 (8) |       | 75.6 (31) | 71.0 (22) |       |       |
| <b><i>Saturated Fatty Acids</i></b> |           |          |       |           |           |       |       |
| Green                               | 6.3 (1)   | 11.1 (1) | 0.910 | 19.5 (8)  | 22.6 (7)  | 0.922 | 0.841 |
| Orange                              | 12.5 (2)  | 11.1 (1) |       | 14.6 (6)  | 16.1 (5)  |       |       |
| Red                                 | 81.3 (13) | 77.8 (7) |       | 65.9 (27) | 61.3 (19) |       |       |
| <b><i>Sodium</i></b>                |           |          |       |           |           |       |       |
| Green                               | 0 (0)     | 0 (0)    | 0.667 | 4.9 (2)   | 6.5 (2)   | 0.741 | 0.855 |
| Orange                              | 6.3 (1)   | 11.1 (1) |       | 19.5 (8)  | 12.9 (4)  |       |       |
| Red                                 | 93.8 (15) | 88.9 (8) |       | 75.6 (31) | 80.6 (25) |       |       |
| <b><i>Fiber</i></b>                 |           |          |       |           |           |       |       |
| Green                               | 6.3 (1)   | 0 (0)    | 0.605 | 26.8 (11) | 16.1 (5)  | 0.528 | 0.461 |
| Orange                              | 43.8 (7)  | 33.3 (3) |       | 34.1 (14) | 35.5 (11) |       |       |
| Red                                 | 50.0 (8)  | 66.7 (6) |       | 39.0 (16) | 48.4 (15) |       |       |

---

P by  $X^2$  test for intra- and inter-interventions

## Supplementary Table S2

Nutrient content of the restaurants for starters and main dishes in control and intervention groups at the beginning and at the end of the study

|                            | Control       |                |       | Intervention  |                |       |
|----------------------------|---------------|----------------|-------|---------------|----------------|-------|
|                            | Baseline      | End            | P     | Baseline      | End            | P     |
| <b>Starters</b>            | (n=10)        | (n=4)          |       | (n = 29)      | (n = 27)       |       |
| Energy, <i>kcal</i>        | 402 (243-570) | 521 (352-586)  | 0.394 | 424 (252-552) | 420 (254- 543) | 0.799 |
| Proteins, <i>g</i>         | 18 (11-23)    | 19 (17-27)     | 0.570 | 18 (12-30)    | 17 (10-30)     | 0.583 |
| Proteins, % of Energy      | 20 (12-26)    | 17 (13-23)     | 0.776 | 19 (12-30)    | 17 (9.7-29)    | 0.694 |
| Carbohydrates, <i>g</i>    | 20 (10-48)    | 34 (20-68)     | 0.256 | 21 (8.3-41)   | 16 (7.4-31)    | 0.560 |
| Carbohidrates, % of Energy | 22 (11-36)    | 30 (19-48)     | 0.320 | 22 (8.4-32)   | 15 (7.2-25)    | 0.652 |
| Sugar, <i>g</i>            | 6.5 (2.4-12)  | 7.3 (6.4-14)   | 0.394 | 4.5 (1.7-10)  | 4.5 (1.3- 8.2) | 0.812 |
| Sugar, % of Energy         | 4.6 (4.4-11)  | 7.5 (4.4-13)   | 0.719 | 4.1 (2.1-11)  | 3.9 (2.0-10)   | 0.831 |
| Fat, <i>g</i>              | 19 (12-37)    | 26 (15-37)     | 0.570 | 25 (12-42)    | 25 (12-40)     | 0.993 |
| Fat, % of Energy           | 55 (39-70)    | 50 (29-65)     | 0.670 | 60 (44-72)    | 68 (47-62)     | 0.527 |
| Saturated Fat, <i>g</i>    | 3.6 (2.0- 11) | 8.4 (2.4-19)   | 0.394 | 4.5 (1.9-14)  | 4.5 (1.9-14)   | 0.967 |
| Saturated Fat, % of Energy | 8.1 (6.3- 25) | 17 (4.8-30)    | 0.776 | 8.9 (6.6-17)  | 9.0 (7.0-19)   | 0.743 |
| Sodium, <i>g</i>           | 1.0 (0.8-1.5) | 1.3 (0.8- 1.6) | 0.478 | 1.0 (0.6-1.6) | 0.8 (0.5- 1.4) | 0.290 |

**Supplementary Table S2 (cont)**

|                            |               |                |       |                |               |       |
|----------------------------|---------------|----------------|-------|----------------|---------------|-------|
| Fiber, g                   | 2.8 (1.6-3.9) | 2.6 (0.5 -3.6) | 0.776 | 2.4 (0.6- 5.1) | 2.3 (0.4-3.4) | 0.571 |
| <b>Main dishes</b>         | (n=16)        | (n=9)          |       | (n=41)         | (n=31)        |       |
| Energy, <i>kcal</i>        | 480 (329-768) | 527 (243-841)  | 0.978 | 505 (381-776)  | 450 (350-599) | 0.397 |
| Proteins, g                | 30 (25-44)    | 36 (14-56)     | 0.677 | 33 (23-44)     | 32 (22-39)    | 0.763 |
| Proteins, % of Energy      | 24 (17-30)    | 26 (15-30)     | 0.978 | 25 (19-35)     | 28 (21-38)    | 0.328 |
| Carbohydrates, g           | 11 (5.6-25)   | 10 (3.5-21)    | 0.357 | 21 (6.4-57)    | 21 (4.3-54)   | 0.789 |
| Carbohydrates, % of Energy | 10 (5.5-16)   | 8.1 (4.3-13)   | 0.357 | 12 (4.8-41)    | 13 (4.3-41)   | 0.973 |
| Sugar, g                   | 3.9 (1.4-5.6) | 2.2 (1.1-5.5)  | 0.419 | 3.2 (1.2-5.6)  | 3.1 (1.2-5.2) | 0.501 |
| Sugar, % of Energy         | 2.7 (1.3-4.6) | 1.6 (0.9-3.9)  | 0.335 | 2.6 (0.9-4.7)  | 2.8 (0.6-4.9) | 0.815 |
| Fat, g                     | 25 (17-57)    | 32 (15-65)     | 0.934 | 25 (13-57)     | 23 (11-36)    | 0.423 |
| Fat, % of Energy           | 59 (46-74)    | 60 (57-80)     | 0.357 | 50 (31-69)     | 48 (30-65)    | 0.484 |
| Saturated Fat, g           | 6.8 (4.3- 16) | 5.8 (3.8-18)   | 0.977 | 4.9 (2.4-11)   | 4.6 (1.7- 12) | 0.621 |
| Saturated Fat, % of Energy | 13 (11-9)     | 16 (10-23)     | 0.541 | 10 (6.1-16)    | 11 (5.5-17)   | 0.955 |
| Sodium, g                  | 1.0 (0.8-1.8) | 1.0 (0-7-1.2)  | 0.411 | 1.0 (0.5- 1.4) | 1.0 (0.8-1.3) | 0.968 |
| Fiber, g                   | 1.9 (1.4-3.9) | 1.5 (0.2-2.1)  | 0.158 | 2.4 (0.7-4.4)  | 2.3 (0.4-2.9) | 0.231 |

Data expressed as median (25<sup>th</sup>-75<sup>th</sup> percentiles). U Mann Whitney/W Wilcoxon test for intra-treatment comparisons. No between treatment differences were observed (Ps by  $X^2=1$ )

### Supplementary Table S3

Allergen content, vegetarian, and vegan adequacy at restaurants throughout the study

|                    | Control          |              |       | Intervention      |              |       |                           |
|--------------------|------------------|--------------|-------|-------------------|--------------|-------|---------------------------|
|                    | Baseline<br>%(n) | End<br>% (n) | P     | Baseline<br>% (n) | End<br>% (n) | P     | P for inter-<br>Treatment |
| <b>Starters</b>    |                  |              |       |                   |              |       |                           |
| Gluten free        | 40 (4)           | 50 (2)       | 0.733 | 58.6 (17)         | 48.1 (13)    | 0.432 | 0.650                     |
| Vegetarian dishes  | 10 (1)           | 0.0 (0)      | 0.512 | 20.7 (6)          | 29.6 (8)     | 0.440 | 0.426                     |
| Vegan dishes       | 0.0 (0)          | 0.0 (0)      | -     | 13.8 (4)          | 14.8 (4)     | 0.913 | 0.730                     |
| Allergen-Free      | 10 (1)           | 0.0 (0)      | -     | 6.9 (2)           | 7.4 (2)      | 0.941 | 0.813                     |
| <b>Main dishes</b> |                  |              |       |                   |              |       |                           |
| Gluten free        | 62.5 (10)        | 44.4 (4)     | 0.383 | 51.2 (21)         | 45.2 (14)    | 0.611 | 0.363                     |
| Vegetarian dishes  | 0.0 (0)          | 0.0 (0)      | -     | 0.0 (0)           | 0.0 (0)      | -     | -                         |
| Vegan dishes       | 0.0 (0)          | 0.0 (0)      | -     | 0.0 (0)           | 0.0 (0)      | -     | -                         |
| Allergen-Free      | 6.3 (1)          | 11.1 (1)     | 0.667 | 2.4 (1)           | 3.2 (1)      | 0.841 | 0.716                     |

**Supplementary Table S3 (cont)*****Desserts***

|                   |         |          |       |          |          |       |       |
|-------------------|---------|----------|-------|----------|----------|-------|-------|
| Gluten free       | 70 (7)  | 71.4 (5) | 0.949 | 50 (3)   | 37.5 (3) | 0.640 | 0.605 |
| Vegetarian dishes | 60 (6)  | 42.9 (3) | 0.486 | 83.3 (5) | 75 (6)   | 0.707 | 0.611 |
| Vegan dishes      | 0.0 (0) | 0.0 (0)  | -     | 16.7 (1) | 50 (4)   | 0.198 | 0.122 |
| Allergen-Free     | 0.0 (0) | 0.0 (0)  | -     | 0.0 (0)  | 50 (4)   | 0.040 | 0.027 |

---

P by X<sup>2</sup> test for intra- and inter-treatment changes
